# Supplementary material for: Catalyst-free site-specific surface modifications of nanocrystalline diamond films via microchannel cantilever spotting
Source: Royal Society of Chemistry journal article supplement (doi:10.1039/c6ra12194b), 2016-01-01
Supplement: c6ra12194b1.pdf [file c6ra12194b1.pdf]

## Catalyst-free site-specific surface modifications of nanocrystalline diamond films *via* microchannel cantilever spotting

Marina Davydova,<sup>\*a</sup> Andres de los Santos Pereira,<sup>b</sup> Michael Bruns,<sup>c</sup> Alexander Kromka,<sup>a</sup> Egor Ukraintsev,<sup>a</sup> Michael Hirtz,<sup>d</sup> and Cesar Rodriguez-Emmenegger<sup>\*b,e</sup>

<sup>a</sup> Institute of Physics v.v.i., Academy of Sciences of the Czech Republic, Cukrovarnicka 10, 16200 Prague 6, Czech Republic. E-mail: davydova@fzu.cz

<sup>b</sup> Department of Chemistry and Physics of Surfaces and Biointerfaces, Institute of Macromolecular Chemistry v.v.i., Academy of Sciences of the Czech Republic, Heyrovsky Sq. 2, 16206 Prague 6, Czech Republic.

<sup>c</sup> Institute for Applied Materials (IAM) and Karlsruhe Nano Micro Facility (KNMF), Karlsruhe Institute of Technology (KIT), 76344, Eggenstein-Leopoldshafen, Germany.

<sup>d</sup> Institute of Nanotechnology (INT) and Karlsruhe Nano Micro Facility (KNMF), Karlsruhe Institute of Technology (KIT), 76344, Eggenstein-Leopoldshafen, Germany.

<sup>e</sup> DWI – Leibniz Institute for Interactive Materials and Institute of Technical and Macromolecular Chemistry, RWTH Aachen University, Forckenbeckstraße 50, 52074 Aachen, Germany. E-mail: rodriguez@dwi.rwth-aachen.de

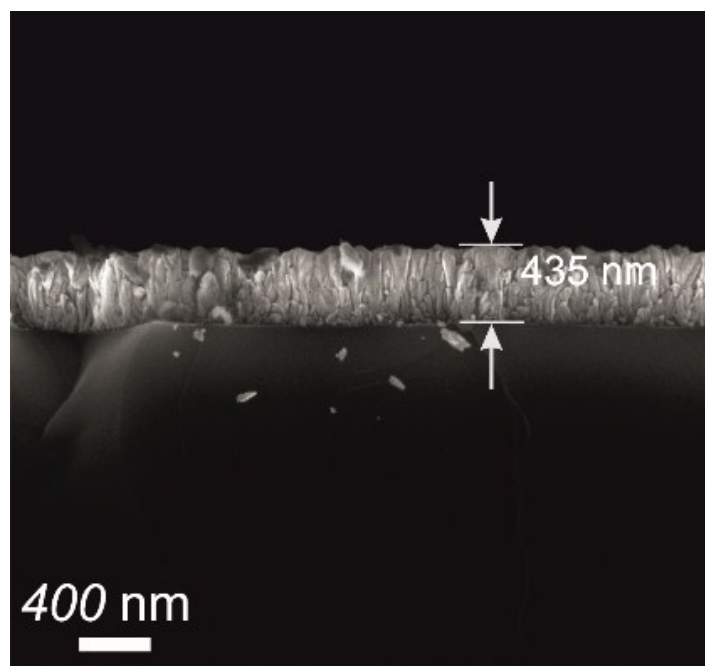

**Fig. S1** Scanning electron microscopy image of the cross-section of the NCD film, obtained after fracturing the sample.
